# Supplementary material for: Regioselectivity control of radiation-induced reaction: electron beam-induced Fries rearrangement of sulfonamide within a β-cyclodextrin inclusion complex
Source: Royal Society of Chemistry journal article supplement (doi:10.1039/b606689e), 2006-01-01
Supplement: b606689e.pdf [file b606689e.pdf]

**Electronic Supplementary Information (ESI):**

**Regioselectivity Control of Radiation-Induced Reaction:  
Electron Beam-Induced Fries Rearrangement of  
Sulfonamide within  $\beta$ -Cyclodextrin Inclusion Complex**

Jun Kato,<sup>\*,a</sup> Hiroyuki Kakehata,<sup>a</sup> Yasunari Maekawa,<sup>b</sup> and Takashi Yamashita<sup>a</sup>

*Department of Pure and Applied Chemistry, Tokyo University of Science, 2641 Yamazaki, Noda, Chiba 278-8510, Japan; Conducting Polymer Materials Group, Quantum Beam Science Directorate, Japan Atomic Energy Agency (JAEA), 1233 Watanuki, Takasaki, Gunma 370-1292, Japan*

E-mail: kato@rs.noda.tus.ac.jp

**Experimental**

**Materials and Measurements.** Benzenesulfonamide (BSA) and phenyl *p*-toluenesulfonate (PTS) were purified by recrystallization from MeOH/H<sub>2</sub>O. *p*-Toluenesulfonamide (TSA) was prepared from *p*-toluenesulfonyl chloride and aniline following the previously reported procedure.<sup>S1</sup> Organic solvents were purified by standard procedures. All the other chemicals were purchased from TCI and used directly unless otherwise noted.

NMR spectra were recorded using a JEOL GSX270W NMR (<sup>1</sup>H, 270 MHz; <sup>13</sup>C, 67.8 MHz) spectrometer. X-ray diffraction (XRD) patterns were measured using a Rigaku CN2013 diffractometer. Gas chromatography (GC) measurement carried out with a Shimadzu GC-1700AF equipped with FID by using a J&W Scientific DB-1 capillary column. GC-MS analysis was performed with a Shimadzu GCMS-QP5000.

**Characterization Data of EB-Fries Rearrangement Products.**

**2-Aminophenyl phenyl sulfone (*o*-Fries product from BSA):**  $^1\text{H}$  NMR ( $\text{CDCl}_3$ , TMS)  $\delta$  7.92 (d,  $J = 8$  Hz, 2H, ArH), 7.83 (d,  $J = 8$  Hz, 1H, ArH), 7.57-7.44 (m, 3H, ArH), 7.27 (t,  $J = 8$  Hz, 1H, ArH), 6.77 (t,  $J = 8$  Hz, 1H, ArH), 6.64 (d,  $J = 8$  Hz, 1H, ArH), 4.96 (br, 2H,  $-\text{NH}_2$ ).  $^{13}\text{C}$  NMR ( $\text{CDCl}_3$ , TMS)  $\delta$  146.3, 141.8, 135.0, 133.1, 129.9, 129.0, 126.8, 121.8, 117.8, 117.7. MS (EI)  $m/z$  233 ( $\text{M}^+$ ), 168, 92, 80, 65, 51.

**4-Aminophenyl phenyl sulfone (*p*-Fries product from BSA):**  $^1\text{H}$  NMR (Acetone- $d_6$ , TMS)  $\delta$  7.91-7.88 (m, 2H, ArH), 7.64 (d,  $J = 8$  Hz, 2H, ArH), 7.57-7.51 (m, 3H, ArH), 6.75 (d,  $J = 8$  Hz, 2H, ArH), 5.52 (br, 2H,  $-\text{NH}_2$ ).  $^{13}\text{C}$  NMR (Acetone- $d_6$ , TMS)  $\delta$  154.2, 145.0, 133.2, 130.6, 130.0, 128.5, 127.7, 114.3. MS (EI)  $m/z$  233 ( $\text{M}^+$ ), 140, 108, 92, 80, 65, 51.

**2-Aminophenyl 4-tolyl sulfone (*o*-Fries product from TSA):**  $^1\text{H}$  NMR ( $\text{CDCl}_3$ , TMS)  $\delta$  7.84-7.79 (m, 3H, ArH), 7.28-7.25 (m, 3H, ArH), 6.77 (t,  $J = 8$  Hz, 1H, ArH), 6.63 (d,  $J = 8$  Hz, 1H, ArH), 5.10 (br, 2H,  $-\text{NH}_2$ ), 2.38 (s, 3H,  $-\text{CH}_3$ ).  $^{13}\text{C}$  NMR ( $\text{CDCl}_3$ , TMS)  $\delta$  146.1, 144.0, 138.8, 134.8, 129.8, 129.7, 126.9, 122.3, 117.8, 117.5, 21.6. MS (EI)  $m/z$  247 ( $\text{M}^+$ ), 182, 167, 139, 91, 80, 65.

**4-Aminophenyl 4-tolyl sulfone (*p*-Fries product from TSA):**  $^1\text{H}$  NMR ( $\text{CDCl}_3$ , TMS)  $\delta$  7.77 (d,  $J = 8$  Hz, 2H, ArH), 7.68 (d,  $J = 8$  Hz, 2H, ArH), 7.25 (d,  $J = 8$  Hz, 2H, ArH), 6.64 (d,  $J = 8$  Hz, 2H, ArH), 4.06 (br, 2H,  $-\text{NH}_2$ ), 2.37 (s, 3H,  $-\text{CH}_3$ ).  $^{13}\text{C}$  NMR ( $\text{CDCl}_3$ , TMS)  $\delta$  150.9, 143.3, 140.0, 129.9, 129.7, 127.1, 114.2, 21.5. MS (EI)  $m/z$  247 ( $\text{M}^+$ ), 140, 108, 92, 80, 65.

**2-Hydroxyphenyl 4-tolyl sulfone (*o*-Fries product from PTS):**  $^1\text{H}$  NMR (Acetone- $d_6$ , TMS)  $\delta$  9.46 (s, 1H,  $-\text{OH}$ ), 7.91-7.88 (m, 3H, ArH), 7.50 (t,  $J = 8$  Hz, 1H, ArH), 7.40 (d,  $J = 8$  Hz, 2H, ArH), 7.05 (t,  $J = 8$  Hz, 1H, ArH), 6.99 (d,  $J = 8$  Hz, 1H, ArH), 2.40 (s, 3H,  $-\text{CH}_3$ ).  $^{13}\text{C}$  NMR (Acetone- $d_6$ , TMS)  $\delta$  156.4, 145.2, 140.1, 136.5, 130.5, 130.0, 128.6, 127.2, 120.9, 118.9, 21.4. MS (EI)  $m/z$  248 ( $\text{M}^+$ ), 181, 108, 92, 77, 65, 51.

**4-Hydroxyphenyl 4-tolyl sulfone (*p*-Fries product from PTS):**  $^1\text{H}$  NMR (Acetone- $d_6$ , TMS)  $\delta$  9.53 (s, 1H,  $-\text{OH}$ ), 7.81 (d,  $J = 8$  Hz, 4H, ArH), 7.38 (d,  $J = 8$  Hz, 2H, ArH), 6.99 (d,  $J = 8$  Hz, 2H, ArH), 2.38 (s, 3H,  $-\text{CH}_3$ ).  $^{13}\text{C}$  NMR ( $\text{CDCl}_3$ , TMS)  $\delta$  162.7, 144.6, 141.2, 133.7, 130.8, 130.7, 128.1, 116.8, 21.4. MS (EI)  $m/z$  248 ( $\text{M}^+$ ), 141, 108, 92, 77, 65, 51.

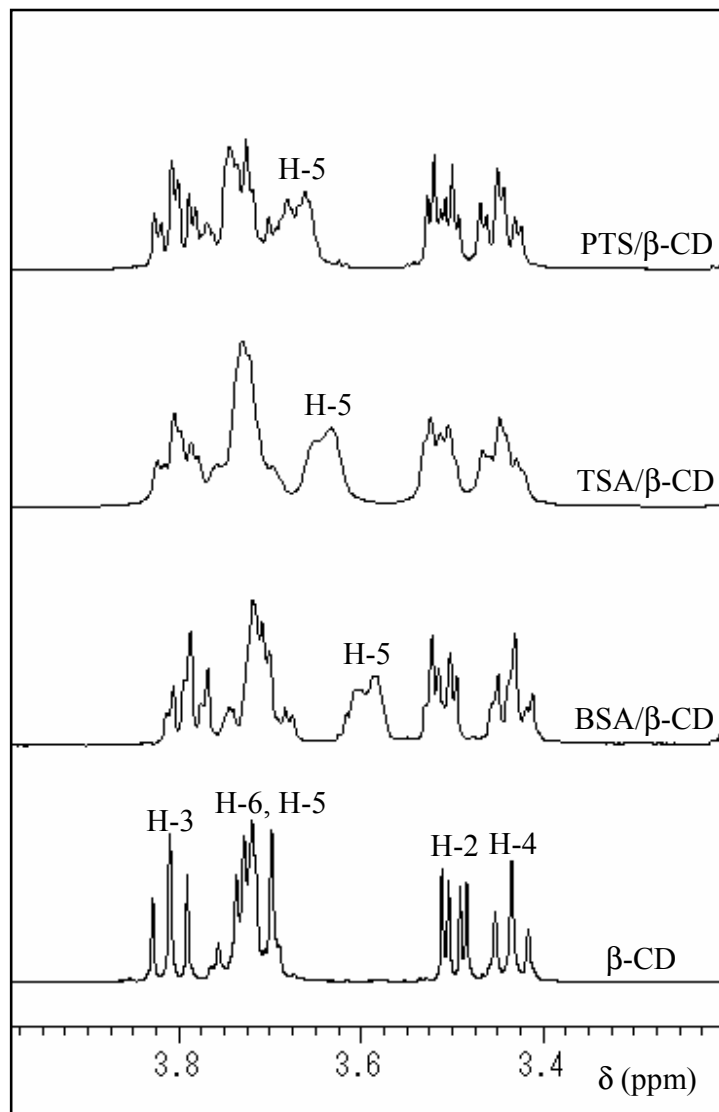

**Fig. S1**  $^1\text{H}$  NMR spectra of  $\beta$ -CD moieties in the inclusion complexes.

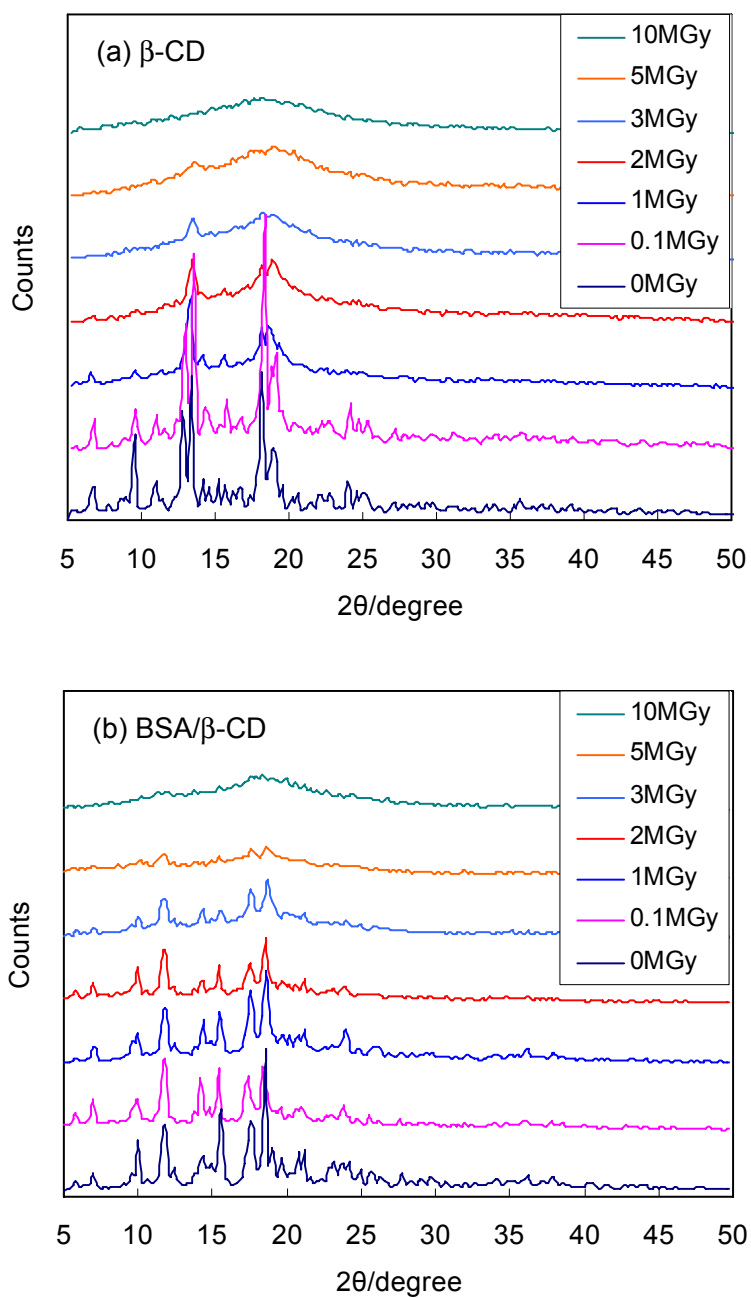

**Fig. S2** Change in X-ray diffraction patterns during EB irradiation: (a)  $\beta$ -CD and (b) BSA/ $\beta$ -CD inclusion complex.

**Table S1** Product distribution upon the EB-Fries rearrangement of BSA within  $\beta$ -CD inclusion complex<sup>a</sup>

Nc1ccc(S(=O)(=O)c2ccccc2)cc1
 $\xrightarrow[\text{Solvent-free}]{\text{EB}}$ 
Nc1ccc(S(=O)(=O)c2ccccc2)cc1
 $+$ 
Nc1ccc(S(=O)(=O)c2ccccc2)cc1
 $+$ 
Nc1ccccc1

BSA                                      o-Fries                                      p-Fries                                      Aniline

| Entry | EB dose <sup>b</sup><br>(MGy) | Conv. <sup>c</sup> (%) | EB-products <sup>c</sup> (%) |                   |         | <i>ortho:para</i> | Proportion<br>of amines (%) |
|-------|-------------------------------|------------------------|------------------------------|-------------------|---------|-------------------|-----------------------------|
|       |                               |                        | <i>o</i> -Fries              | <i>p</i> -Fries   | Aniline |                   |                             |
| 1     | 0.1                           | 7.8                    | N.D. <sup>d</sup>            | N.D. <sup>d</sup> | 35.8    | -                 | 36                          |
| 2     | 1                             | 46                     | 12.9                         | 20.9              | 36.2    | 1 : 1.6           | 70                          |
| 3     | 2                             | 64                     | 16.5                         | 27.5              | 41.8    | 1 : 1.7           | 86                          |
| 4     | 3                             | 83                     | 11.7                         | 19.7              | 26.0    | 1 : 1.7           | 57                          |
| 5     | 5                             | 93                     | 7.7                          | 13.0              | 12.9    | 1 : 1.7           | 34                          |
| 6     | 10                            | 97                     | 6.1                          | 9.5               | 6.0     | 1 : 1.6           | 22                          |

<sup>a</sup> Determined by GC. <sup>b</sup> Absorbed EB dose. <sup>c</sup> Calculated on the consumed BSA.

<sup>d</sup> Not detected.

## Reference

(S1) M. Neeman, A. Modiano, *J. Org. Chem.*, 1956, **21**, 667.
